# Supplementary material
Source: PubMed Central journal article supplement (PMC3358764)

**Tables and figures for online appendix.**

| Table 5 appendix. Additional characteristics of participants at baseline |                        |                        |
|--------------------------------------------------------------------------|------------------------|------------------------|
| Variable                                                                 | On-line HDF<br>(n=358) | Low flux HD<br>(n=356) |
| Primary renal diagnosis – no (%)                                         |                        |                        |
| Renal vascular disease                                                   | 104 (29)               | 96 (27)                |
| Diabetes mellitus                                                        | 76 (21)                | 60 (17)                |
| Glomerulonephritis                                                       | 36 (10)                | 53 (15)                |
| Interstitial nephropathy                                                 | 35 (10)                | 31 (9)                 |
| Cystic kidney disease                                                    | 27 (7)                 | 26 (7)                 |
| Multisystem disease                                                      | 15 (4)                 | 11 (3)                 |
| Other                                                                    | 39 (11)                | 45 (13)                |
| Unknown                                                                  | 26 (7)                 | 34 (9)                 |
| History of cardiovascular disease – no. (%)                              |                        |                        |
| Previous myocardial infarction                                           | 42 (12)                | 56 (16)                |
| Previous PTCA or CABG                                                    | 58 (16)                | 58 (16)                |
| Previous stroke or TIA                                                   | 50 (14)                | 59 (16)                |
| Previous peripheral artery disease                                       | 62 (17)                | 50 (14)                |
| Previous amputation                                                      | 17 (5)                 | 13 (4)                 |
| Medication (see also table 1) – no. (%)                                  |                        |                        |
| Calcium antagonist                                                       | 109 (30)               | 112 (31)               |
| Insulin                                                                  | 70 (20)                | 52 (15)                |
| Calcium containing phosphate binder                                      | 142 (40)               | 154 (43)               |
| Sevelamer                                                                | 225 (63)               | 221 (62)               |
| Lanthanum carbonate                                                      | 20 (6)                 | 20 (6)                 |

HDF denotes hemodiafiltration and HD hemodialysis. PTCA means percutaneous transluminal coronary angioplasty, CABG = coronary artery bypass graft, TIA = transient ischemic attack

Table 6 appendix. Dialyser characteristics

| dialyser                   | Membrane material   | Membrane surface area (m <sup>2</sup> ) | KUF (ml/mmHg/hr) |
|----------------------------|---------------------|-----------------------------------------|------------------|
| <b>High flux dialysers</b> |                     |                                         |                  |
| FX80                       | polysulfone         | 1.8                                     | 59               |
| FX100                      | polysulfone         | 2.2                                     | 73               |
| Optiflux F200NR            | polysulfone         | 2.0                                     | 62               |
| Polyflux 170H              | PES, PVP, PA blend* | 1.7                                     | 70               |
| Polyflux 210H              | PES, PVP, PA blend* | 2.1                                     | 85               |
| <b>Low flux dialysers</b>  |                     |                                         |                  |
| F6HPS                      | polysulfone         | 1.3                                     | 13               |
| F8HPS                      | polysulfone         | 1.8                                     | 18               |
| Optiflux 18NR              | polysulfone         | 1.8                                     | 12               |
| Polyflux 14L               | PES, PVP, PA blend* | 1.4                                     | 10               |
| Polyflux 17L               | PES, PVP, PA blend* | 1.7                                     | 13               |

\*polyarylethersulfone, polyvinylpyrrolidone, polyamide blend

Figure 4 appendix: Sequential analysis. Boundaries for double triangular test with  $\alpha = 0.05$ , power 0.80 and hazard ratio 0.75.  $Z$  is the observed number of events in the control group minus the expected number of events given treatment equivalence.  $V$  is approximately equal to a quarter of the number of events observed.

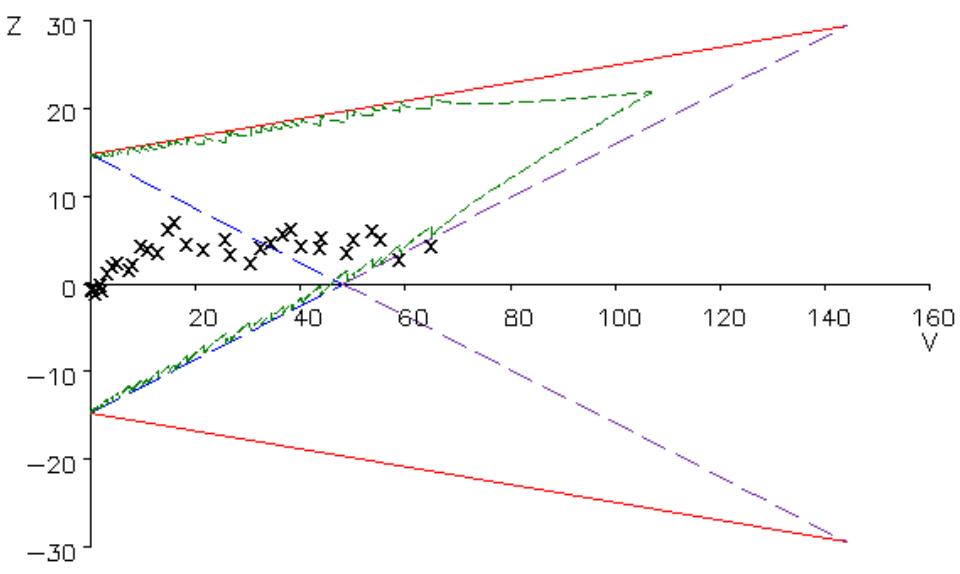

Supplement: ASN.2011121140_ASN2011121140SupplementaryData.pdf [file ASN.2011121140_ASN2011121140SupplementaryData.pdf]
